# Supplementary material
Source: PubMed Central journal article supplement (PMC7292610)
Supplement: mmc1.pdf [file mmc1.pdf]

## Supplementary appendix

This appendix formed part of the original submission and has been peer reviewed. We post it as supplied by the authors.

Supplement to: Garassino MC, Whisenant JG, Huang L-C, et al. COVID-19 in patients with thoracic malignancies (TERAVOLT): first results of an international, registry-based, cohort study. *Lancet Oncol* 2020; published online June 12. [http://dx.doi.org/10.1016/S1470-2045\(20\)30314-4](http://dx.doi.org/10.1016/S1470-2045(20)30314-4).

## Appendix

### **COVID-19 in patients with thoracic malignancies (TERAVOLT): first results of an international, registry-based, cohort study**

#### **CONTENTS**

|                                                                               |    |
|-------------------------------------------------------------------------------|----|
| Supplementary Table S1: Collected information.....                            | 2  |
| Supplementary Table S2: Univariable analysis .....                            | 3  |
| Supplementary Table S3: List of investigators (updated on 9th May 2020) ..... | 8  |
| Supplementary Table 4: List of patients recruited for each site .....         | 12 |
| Protocol .....                                                                | 14 |

**Supplementary Table S1:  
Collected information**

| <b>Demographics</b>                                                                                                                                                                                                                                                                                                                                                                                                                                                                                                                                                                                                                                                                                                                                                                                                     | <b>COVID-19 diagnosis</b>                                                                                                                                                                                                                                                                                                                                                                                                                                                                                                                                                                                                                                                                                                                                                                                                                                                                                                                                                                                                                                                                 |
|-------------------------------------------------------------------------------------------------------------------------------------------------------------------------------------------------------------------------------------------------------------------------------------------------------------------------------------------------------------------------------------------------------------------------------------------------------------------------------------------------------------------------------------------------------------------------------------------------------------------------------------------------------------------------------------------------------------------------------------------------------------------------------------------------------------------------|-------------------------------------------------------------------------------------------------------------------------------------------------------------------------------------------------------------------------------------------------------------------------------------------------------------------------------------------------------------------------------------------------------------------------------------------------------------------------------------------------------------------------------------------------------------------------------------------------------------------------------------------------------------------------------------------------------------------------------------------------------------------------------------------------------------------------------------------------------------------------------------------------------------------------------------------------------------------------------------------------------------------------------------------------------------------------------------------|
| Country and city of diagnosis<br>Gender, Age<br>Ethnicity<br>Smoking status<br>Height, Weight<br>Blood Type<br>Seasonal flu vaccine 2019                                                                                                                                                                                                                                                                                                                                                                                                                                                                                                                                                                                                                                                                                | <b>COVID-19 suspicious</b> (clinical, radiological, laboratory)<br><b>Date of COVID-19 diagnosis</b><br><b>Diagnostic test performed</b> (RT-PCR, serology, others)<br><b>Symptoms</b> (fever>37.5, cough, dyspnea, nasal congestion, conjunctival congestion, diarrhea, myalgia, otitis, loss of smell and/or taste, headache, fatigue, shivers, other)<br>Close contact with infected people                                                                                                                                                                                                                                                                                                                                                                                                                                                                                                                                                                                                                                                                                            |
| <b>Clinical informations</b>                                                                                                                                                                                                                                                                                                                                                                                                                                                                                                                                                                                                                                                                                                                                                                                            | <b>Course of COVID-19</b>                                                                                                                                                                                                                                                                                                                                                                                                                                                                                                                                                                                                                                                                                                                                                                                                                                                                                                                                                                                                                                                                 |
| <b>Comorbidities</b> (COPD, lung fibrosis, diabetes, history of cerebrovascular disease, history of ischemic heart disease, chronic kidney insufficiency, hypertension, autoimmune disease, HBV or HCV chronic hepatitis, history of TBC, others)<br>O <sub>2</sub> requirement prior to Covid-19<br><b>Concomitant medications</b> (ACE inhibitors, sartan, NSAIDs, immunosuppressive drugs, ASA, anticoagulants, others); chronic supplemental O <sub>2</sub><br><b>History of cancer</b><br>Histological diagnosis<br>Date of first diagnosis<br>Stage at first diagnosis<br>Surgery or RT for localized disease<br>Stage at last follow up<br>ECOG PS at last follow up<br>Date of last oncologic follow up<br>Stage at COVID-19 diagnosis<br>Sites of metastasis<br>Antineoplastic treatments in the last 3 months | <b>Complications</b> (pneumonitis, ARDS, sepsis, coagulopathy, arrhythmia, heart failure, bacterial infection, multi-organ failure, other)<br><b>Treatments administered</b> (antibiotics, antivirals, antifungals, steroids, anti IL-6, chloroquine, other)<br><b>Labs at Covid-19 diagnosis</b> (Hgb, WBC, neutrophils, lymphocytes, eosinophils, platelets, procalcitonin, CRP, IL-6, triglycerides, ferritin, albumin, creatinine, Na, K, Ca, glucose, ALT, AST, LDH, bilirubin, GGT, CPK, d-dimer, PT, troponin I, troponin T, fibrinogen, SpO <sub>2</sub> , PaO <sub>2</sub> /FiO <sub>2</sub> and PaCO <sub>2</sub> on arterial blood gas analysis)<br><b>Imaging modality</b> (CT scan, Chest x-ray)<br><b>Radiological abnormalities</b> (ground-glass, bilateral findings, consolidation, interstitial abnormalities, pleural effusion)<br><b>Outcome</b><br>Admission to ICU<br>Death (home, hospital, ICU)<br>Reason of death (Cancer progression, COVID-19)<br>Discharged<br>Continuation of oncological treatment after recovery<br>Delay of planned oncological treatment |

**Information Collected List of abbreviations:** body mass index (BMI), chronic obstructive pulmonary disease (COPD), hepatitis B virus (HBV), hepatitis C virus (HCV), tuberculosis (TBC), angiotensin converting enzyme (ACE), non steroid anti-inflammatory drugs (NSAIDs), acetylsalicylic acid (ASA), radiation therapy (RT), Eastern Cooperative Oncology Group (ECOG), performance status (PS), real time polymerase chain reaction (RT-PCR), intensive care unit (ICU), acute respiratory distress syndrome (ARDS), hemoglobin (Hgb), white blood cells (WBC), C-reactive protein (CRP), interleukin-6 (IL-6), O<sub>2</sub> saturation by pulse oximetry (SpO<sub>2</sub>), partial pressure of oxygen (PaO<sub>2</sub>), fraction of inspired oxygen (FiO<sub>2</sub>), partial pressure of CO<sub>2</sub> (PaCO<sub>2</sub>), computed tomography (CT).

**Measurement Units:** cm (height), Kg (weight), mg/dl (Hgb, tryglycerides, creatinine, Ca, glucose, bilirubin, fibrinogen), x 10<sup>9</sup>/L (white blood cells), x10<sup>3</sup>/mcl (neutrophil and lymphocyte, platelet count), ng/mL (procalcitonin, ferritin, D-dimer), pg/mL (IL-6), gm/dl (albumin), mmol/L (Na, K, CO<sub>2</sub>), unit/L (ALT, AST, ggT, CPK), U/L (LDH), mg/L (C-reactive protein), ng/L (Troponin I, troponin T), seconds (PT), % (SpO<sub>2</sub>, PaO<sub>2</sub>/FiO<sub>2</sub>). No unspecified cut-offs was used.

**Supplementary Table S2:  
Univariable analysis**

| Characteristic                                                                   | Hospitalization        |                         | Prolonged Hospitalization (>8 days) |                         | Death (die during hospitalization, ICU or at home) |                         |
|----------------------------------------------------------------------------------|------------------------|-------------------------|-------------------------------------|-------------------------|----------------------------------------------------|-------------------------|
|                                                                                  | Patients with Response | Odds Ratio (95% CI)     | Patients with Response              | Odds Ratio (95% CI)     | Patients with Response                             | Odds Ratio (95% CI)     |
| <b>Age in year - no./total no. (%)</b>                                           |                        |                         |                                     |                         |                                                    |                         |
| ≤ 65                                                                             | 55/78 (71)             | Reference               | 13/26 (50)                          | Reference               | 19/73 (26)                                         | Reference               |
| >65                                                                              | 97/122 (80)            | 1.623 (0.840 to 3.133)  | 18/32 (56)                          | 1.286 (0.454 to 3.672)  | 47/118 (40)                                        | 1.881 (1.003 to 3.623)  |
| <b>Smoking Status - no./total no. (%)</b>                                        |                        |                         |                                     |                         |                                                    |                         |
| Current/Former                                                                   | 122/159 (77)           | 1.395 (0.611 to 3.035)  | 24/41 (59)                          | 2.353 (0.732 to 8.113)  | 61/153 (40)                                        | 4.243 (1.695 to 12.946) |
| Never                                                                            | 26/37 (70)             | Reference               | 6/16 (38)                           | Reference               | 5/37 (14)                                          | Reference               |
| <b>Gender - no./total no. (%)</b>                                                |                        |                         |                                     |                         |                                                    |                         |
| Female                                                                           | 42/59 (71)             | 0.696 (0.352 to 1.407)  | 8/18 (44)                           | 0.591 (0.188 to 1.808)  | 14/56 (25)                                         | 0.532 (0.258 to 1.049)  |
| Male                                                                             | 110/141 (78)           | Reference               | 23/40 (58)                          | Reference               | 52/135 (39)                                        | Reference               |
| <b>Stage of disease at COVID diagnosis - no./total no. (%)</b>                   |                        |                         |                                     |                         |                                                    |                         |
| Stage I/II/III                                                                   | 41/53 (77)             | Reference               | 10/17 (59)                          | Reference               | 17/49 (35)                                         | Reference               |
| Stage IV                                                                         | 111/147 (76)           | 0.902 (0.415 to 1.863)  | 21/41 (51)                          | 0.735 (0.227 to 2.290)  | 49/142 (35)                                        | 0.992 (0.505 to 1.992)  |
| <b>Diagnosis - no./total no. (%)</b>                                             |                        |                         |                                     |                         |                                                    |                         |
| NSCLC                                                                            | 111/151 (74)           | Reference               | 26/41 (63)                          | Reference               | 52/144 (36)                                        | Reference               |
| SCLC                                                                             | 23/29 (80)             | 1.381 (0.553 to 3.958)  | 2/6 (33)                            | 0.288 (0.037 to 1.660)  | 10/28 (36)                                         | 0.983 (0.409 to 2.252)  |
| Thymoma/Thymic carcinoma/Carcinoid/neuroendocrine/Malignant Pleural Mesothelioma | 18/20 (90)             | 3.243 (0.882 to 20.978) | 3/11 (27)                           | 0.216 (0.042 to 0.873)  | 4/19 (21)                                          | 0.472 (0.129 to 1.380)  |
| <b>Current treatment - no./total no. (%)</b>                                     |                        |                         |                                     |                         |                                                    |                         |
| Yes                                                                              | 106/147 (72)           | 0.402 (0.156 to 0.915)  | 16/35 (46)                          | 0.449 (0.146 to 1.307)  | 53/142 (37)                                        | 1.649 (0.818 to 3.484)  |
| No                                                                               | 45/52 (87)             | Reference               | 15/23 (65)                          | Reference               | 13/49 (27)                                         | Reference               |
| <b>Therapy</b>                                                                   |                        |                         |                                     |                         |                                                    |                         |
| None                                                                             | 45/52 (87)             | Reference               | 15/23 (65)                          | Reference               | 13/49 (27)                                         | Reference               |
| TKI alone                                                                        | 17/28 (61)             | 0.240 (0.077 to 0.708)  | 2/7 (29)                            | 0.213 (0.026 to 1.234)  | 8/28 (29)                                          | 1.108 (0.381 to 3.096)  |
| Chemo alone                                                                      | 35/48 (73)             | 0.419 (0.144 to 1.134)  | 2/8 (25)                            | 0.178 (0.022 to 0.974)  | 22/46 (48)                                         | 2.538 (1.089 to 6.113)  |
| IO alone                                                                         | 26/34 (77)             | 0.506 (0.160 to 1.563)  | 7/10 (70)                           | 1.244 (0.261 to 7.004)  | 11/33 (33)                                         | 1.385 (0.524 to 3.639)  |
| Chemo-IO                                                                         | 16/20 (80)             | 0.622 (0.164 to 2.633)  | 3/7 (43)                            | 0.400 (0.064 to 2.241)  | 5/19 (26)                                          | 0.989 (0.276 to 3.183)  |
| Other                                                                            | 12/17 (71)             | 0.373 (0.100 to 1.451)  | 2/3 (67)                            | 1.067 (0.088 to 25.049) | 7/16 (44)                                          | 2.154 (0.653 to 7.022)  |
| <b>Co-morbidities - no./total no. (%)</b>                                        |                        |                         |                                     |                         |                                                    |                         |
| COPD                                                                             |                        |                         |                                     |                         |                                                    |                         |
| Yes                                                                              | 44/51 (86)             | 2.350 (1.030 to 6.087)  | 9/13 (69)                           | 2.352 (0.662 to 9.721)  | 21/49 (42.9)                                       | 1.600 (0.816 to 3.116)  |
| No                                                                               | 107/147 (73)           | Reference               | 22/45 (49)                          | Reference               | 45/141 (31.9)                                      | Reference               |

|                                                    |              |                         |            |                          |             |                         |
|----------------------------------------------------|--------------|-------------------------|------------|--------------------------|-------------|-------------------------|
| <b>Lung Fibrosis</b>                               |              |                         |            |                          |             |                         |
| Yes                                                | 3/3 (100)    |                         | 0/0        |                          | 2/3 (67)    | 3.844 (0.362 to 83.639) |
| No                                                 | 148/195 (78) |                         | 31/58 (53) |                          | 64/187 (34) | Reference               |
| <b>Diabetes</b>                                    |              |                         |            |                          |             |                         |
| Yes                                                | 20/29 (69)   | 0.645 (0.277 to 1.595)  | 3/5 (60)   | 1.339 (0.206 to 10.797)  | 9/28 (32)   | 0.873 (0.356 to 2.008)  |
| No                                                 | 131/169 (78) | Reference               | 28/53 (53) | Reference                | 57/162 (35) | Reference               |
| <b>H/O Ischemic heart disease</b>                  |              |                         |            |                          |             |                         |
| Yes                                                | 23/30 (78)   | 1.027 (0.428 to 2.747)  | 7/8 (88)   | 7.583 (1.223 to 147.264) | 10/28 (36)  | 1.052 (0.440 to 2.393)  |
| No                                                 | 128/168 (76) | Reference               | 24/50 (48) | Reference                | 56/162 (35) | Reference               |
| <b>H/O Cerebrovascular disease</b>                 |              |                         |            |                          |             |                         |
| Yes                                                | 8/10 (80)    | 1.259 (0.302 to 8.541)  | 3/5 (60)   | 1.339 (0.206 to 10.797)  | 1/10 (10)   | 0.197 (0.011 to 1.080)  |
| No                                                 | 143/188 (76) | Reference               | 28/53 (53) | Reference                | 65/180 (36) | Reference               |
| <b>Chronic kidney insufficiency</b>                |              |                         |            |                          |             |                         |
| Yes                                                | 13/15 (87)   | 2.120 (0.558 to 13.884) | 1/2 (50)   | 0.867 (0.033 to 22.650)  | 5/14 (36)   | 1.047 (0.310 to 3.171)  |
| No                                                 | 138/183 (75) | Reference               | 30/56 (54) | Reference                | 61/176 (35) | Reference               |
| <b>Chronic hepatitis</b>                           |              |                         |            |                          |             |                         |
| Yes                                                | 2/3 (67)     | 0.617 (0.058 to 13.464) | 1/2 (50)   | 0.867 (0.033 to 22.650)  | 0/3 (0)     |                         |
| No                                                 | 149/195 (76) | Reference               | 30/56 (54) | Reference                | 66/187 (35) |                         |
| <b>Autoimmune disease</b>                          |              |                         |            |                          |             |                         |
| Yes                                                | 6/6 (100)    |                         | 1/2 (50)   | 0.867 (0.033 to 22.650)  | 3/6 (50)    | 1.921 (0.347 to 10.639) |
| No                                                 | 145/192 (76) |                         | 30/56 (54) | Reference                | 63/184 (34) | Reference               |
| <b>Hypertension</b>                                |              |                         |            |                          |             |                         |
| Yes                                                | 76/93 (82)   | 1.788 (0.919 to 3.570)  | 13/21 (62) | 1.715 (0.583 to 5.268)   | 35/88 (40)  | 1.512 (0.831 to 2.768)  |
| No                                                 | 75/105 (71)  | Reference               | 18/37 (49) | Reference                | 31/102 (30) | Reference               |
| <b>H/O viral Hepatitis B</b>                       |              |                         |            |                          |             |                         |
| Yes                                                | 6/8 (75)     | 0.931 (0.206 to 6.506)  | 2/3 (67)   | 1.793 (0.163 to 39.919)  | 1/8 (13)    | 0.257 (0.014 to 1.490)  |
| No                                                 | 145/190 (76) | Reference               | 29/55 (53) | Reference                | 65/182 (36) | Reference               |
| <b>H/O viral Hepatitis C</b>                       |              |                         |            |                          |             |                         |
| Yes                                                | 5/5 (100)    |                         | 1/3 (33)   | 0.417 (0.019 to 4.596)   | 0/5 (0)     |                         |
| No                                                 | 146/193 (76) |                         | 30/55 (55) | Reference                | 66/185 (36) |                         |
| <b>H/O tuberculosis</b>                            |              |                         |            |                          |             |                         |
| Yes                                                | 3/3 (100)    |                         | 1/1 (100)  |                          | 0/3 (0)     |                         |
| No                                                 | 148/195 (76) |                         | 30/57 (53) |                          | 66/187 (35) |                         |
| <b>Other</b>                                       |              |                         |            |                          |             |                         |
| Yes                                                | 77/93 (83)   | 2.016 (1.031 to 4.066)  | 14/28 (50) | 0.765 (0.269 to 2.152)   | 35/89 (39)  | 1.464 (0.804 to 2.677)  |
| No                                                 | 74/105 (70)  | Reference               | 17/30 (57) | Reference                | 31/101 (31) | Reference               |
| <b>Co-morbidities - Any - no./total no. (%)</b>    |              |                         |            |                          |             |                         |
| Yes                                                | 134/166 (81) | 3.695 (1.661 to 8.214)  | 25/48 (52) | 0.725 (0.167 to 2.862)   | 60/158 (38) | 2.653 (1.094 to 7.458)  |
| No                                                 | 17/32 (53)   | Reference               | 6/10 (60)  | Reference                | 6/32 (19)   | Reference               |
| <b>Number of comorbidities - no./total no. (%)</b> |              |                         |            |                          |             |                         |
| 0                                                  | 18/34 (53)   | Reference               | 6/10 (60)  | Reference                | 6/33 (18)   | Reference               |
| 1                                                  | 44/60 (73)   | 2.426 (0.989 to 6.039)  | 6/19 (32)  | 0.308 (0.058 to 1.469)   | 23/56 (41)  | 3.020 (1.123 to 9.158)  |

|                                                                                         |                |                         |            |                         |               |                         |
|-----------------------------------------------------------------------------------------|----------------|-------------------------|------------|-------------------------|---------------|-------------------------|
| <b>2</b>                                                                                | 45/53 (85)     | 4.963 (1.828 to 14.413) | 8/16 (50)  | 0.667 (0.126 to 3.276)  | 22/51 (43)    | 3.287 (1.208 to 10.069) |
| <b>≥3</b>                                                                               | 45/53 (85)     | 4.963 (1.828 to 14.413) | 11/13 (85) | 3.667 (0.548 to 32.697) | 15/51 (29)    | 1.806 (0.640 to 5.634)  |
| <b>Concomitant Medications - no./total no. (%)</b>                                      |                |                         |            |                         |               |                         |
| <b>ACE inhibitors</b>                                                                   |                |                         |            |                         |               |                         |
| <b>Yes</b>                                                                              | 23/30 (77)     | 1.051 (0.438 to 2.814)  | 4/4 (100)  |                         | 10/28 (36)    | 1.091 (0.456 to 2.486)  |
| <b>No</b>                                                                               | 125/165 (76)   | Reference               | 27/54 (50) |                         | 54/160 (34)   | Reference               |
| <b>Sartan</b>                                                                           |                |                         |            |                         |               |                         |
| <b>Yes</b>                                                                              | 21/25 (84)     | 1.778 (0.633 to 6.347)  | 2/5 (40)   | 0.552 (0.068 to 3.589)  | 7/25 (28)     | 0.723 (0.268 to 1.768)  |
| <b>No</b>                                                                               | 127/170 (75)   | Reference               | 29/53 (55) | Reference               | 57/163 (35)   | Reference               |
| <b>Nonsteroidal anti-inflammatory drug (NSAID)</b>                                      |                |                         |            |                         |               |                         |
| <b>Yes</b>                                                                              | 1/2 (50)       | 0.313 (0.012 to 8.017)  | 0/0        |                         | 0/2 (0)       |                         |
| <b>No</b>                                                                               | 147/193 (76)   | Reference               | 31/58 (53) |                         | 64/186 (34)   |                         |
| <b>Steroids (&gt;10 mg of prednisone or equivalent)</b>                                 |                |                         |            |                         |               |                         |
| <b>Yes</b>                                                                              | 31/42 (74)     | 0.867 (0.405 to 1.961)  | 3/10 (30)  | 0.306 (0.060 to 1.246)  | 17/42 (40.5)  | 1.432 (0.698 to 2.894)  |
| <b>No</b>                                                                               | 117/153 (77)   | Reference               | 28/48 (58) | Reference               | 47/146 (32.2) | Reference               |
| <b>Immunosuppressive drugs</b>                                                          |                |                         |            |                         |               |                         |
| <b>Yes</b>                                                                              | 2/2 (100)      |                         | 1/1 (100)  |                         | 0/2 (0)       |                         |
| <b>No</b>                                                                               | 146/193 (75.6) |                         | 30/57 (53) |                         | 64/186 (34)   |                         |
| <b>Aspirin (ASA)</b>                                                                    |                |                         |            |                         |               |                         |
| <b>Yes</b>                                                                              | 30/39 (77)     | 1.073 (0.483 to 2.580)  | 8/13 (62)  | 1.530 (0.441 to 5.743)  | 8/37 (22)     | 0.468 (0.189 to 1.052)  |
| <b>No</b>                                                                               | 118/156 (76)   | Reference               | 23/45 (51) | Reference               | 56/151 (37)   | Reference               |
| <b>Anticoagulants</b>                                                                   |                |                         |            |                         |               |                         |
| <b>Yes</b>                                                                              | 42/50 (84)     | 1.932 (0.869 to 4.760)  | 12/18 (67) | 2.211 (0.711 to 7.447)  | 22/50 (44)    | 1.796 (0.919 to 3.497)  |
| <b>No</b>                                                                               | 106/145 (73)   | Reference               | 19/40 (48) | Reference               | 42/138 (30)   | Reference               |
| <b>Other chronic and domiciliary therapy</b>                                            |                |                         |            |                         |               |                         |
| <b>Yes</b>                                                                              | 76/98 (78)     | 1.199 (0.622 to 2.328)  | 15/31 (48) | 0.645 (0.223 to 1.818)  | 34/93 (37)    | 1.249 (0.683 to 2.293)  |
| <b>No</b>                                                                               | 72/97 (74)     | Reference               | 16/27 (59) | Reference               | 30/95 (32)    | Reference               |
| <b>None</b>                                                                             |                |                         |            |                         |               |                         |
| <b>Yes</b>                                                                              | 25/35 (71)     | 0.752 (0.338 to 1.771)  | 9/12 (75)  | 3.273 (0.852 to 16.196) | 11/34 (32)    | 0.911 (0.400 to 1.976)  |
| <b>No</b>                                                                               | 123/160 (77)   | Reference               | 22/46 (48) | Reference               | 53/154 (34)   | Reference               |
| <b>Metastatic disease at the time of COVID-19 lung diagnosis - no./total no. (%)</b>    |                |                         |            |                         |               |                         |
| <b>Yes</b>                                                                              | 111/147 (76)   | 0.902 (0.415 to 1.863)  | 21/41 (51) | 0.735 (0.227 to 2.290)  | 49/142 (35)   | 0.992 (0.505 to 1.992)  |
| <b>No</b>                                                                               | 41/53 (77)     | Reference               | 10/17 (59) | Reference               | 17/49 (34.5)  | Reference               |
| <b>Site of metastatic disease at the time of COVID-19 diagnosis - no./total no. (%)</b> |                |                         |            |                         |               |                         |
| <b>Lung</b>                                                                             |                |                         |            |                         |               |                         |
| <b>Yes</b>                                                                              | 80/102 (78)    | 1.313 (0.686 to 2.534)  | 13/27 (48) | 0.671 (0.234 to 1.890)  | 33/98 (34)    | 0.923 (0.507 to 1.678)  |
| <b>No</b>                                                                               | 72/98 (73)     | Reference               | 18/31 (58) | Reference               | 33/93 (35)    | Reference               |
| <b>Liver</b>                                                                            |                |                         |            |                         |               |                         |
| <b>Yes</b>                                                                              | 17/23 (74)     | 0.881 (0.341 to 2.572)  | 3/4 (75)   | 2.786 (0.333 to 58.281) | 7/21 (33)     | 0.941 (0.340 to 2.393)  |

|                                      |              |                         |            |                          |             |                         |
|--------------------------------------|--------------|-------------------------|------------|--------------------------|-------------|-------------------------|
| No                                   | 135/177 (76) | Reference               | 28/54 (52) | Reference                | 59/170 (35) | Reference               |
| <b>Bone</b>                          |              |                         |            |                          |             |                         |
| Yes                                  | 37/52 (71)   | 0.708 (0.350 to 1.472)  | 10/14 (71) | 2.738 (0.785 to 11.216)  | 17/51 (33)  | 0.929 (0.464 to 1.812)  |
| No                                   | 115/148 (78) | Reference               | 21/44 (48) | Reference                | 49/140 (35) | Reference               |
| <b>Brain</b>                         |              |                         |            |                          |             |                         |
| Yes                                  | 28/44 (64)   | 0.452 (0.219 to 0.946)  | 5/9 (56)   | 1.106 (0.262 to 4.938)   | 12/43 (28)  | 0.674 (0.310 to 1.392)  |
| No                                   | 124/156 (79) | Reference               | 26/49 (53) | Reference                | 54/148 (36) | Reference               |
| <b>Lymph nodes</b>                   |              |                         |            |                          |             |                         |
| Yes                                  | 61/83 (73)   | 0.792 (0.412 to 1.531)  | 14/23 (61) | 1.647 (0.571 to 4.911)   | 31/82 (38)  | 1.285 (0.704 to 2.347)  |
| No                                   | 91/117 (78)  | Reference               | 17/35 (49) | Reference                | 35/109 (32) | Reference               |
| <b>Adrenal</b>                       |              |                         |            |                          |             |                         |
| Yes                                  | 15/22 (68)   | 0.641 (0.252 to 1.776)  | 2/3 (67)   | 1.793 (0.163 to 39.919)  | 7/21 (33)   | 0.941 (0.340 to 2.393)  |
| No                                   | 137/178 (77) | Reference               | 29/55 (53) | Reference                | 59/170 (35) | Reference               |
| <b>Other</b>                         |              |                         |            |                          |             |                         |
| Yes                                  | 24/28 (86)   | 2.063 (0.746 to 7.306)  | 3/9 (33)   | 0.375 (0.072 to 1.594)   | 13/26 (50)  | 2.113 (0.911 to 4.914)  |
| No                                   | 128/172 (74) | Reference               | 28/49 (57) | Reference                | 53/165 (32) | Reference               |
| <b>Not applicable</b>                |              |                         |            |                          |             |                         |
| Yes                                  | 1/1 (100)    |                         | 0/0        |                          | 0/1 (0)     |                         |
| No                                   | 151/199 (76) |                         | 31/58 (53) |                          | 66/190 (35) |                         |
| <b>Diagnosis - no./total no. (%)</b> |              |                         |            |                          |             |                         |
| NSCLC                                | 111/151 (74) | 0.724 (0.253 to 1.809)  | 26/41 (63) | 3.467 (0.603 to 27.228)  | 52/144 (36) | 1.017 (0.444 to 2.443)  |
| SCLC                                 | 23/29 (79)   | Reference               | 2/6 (33)   | Reference                | 10/28 (36)  | Reference               |
| <b>Therapy</b>                       |              |                         |            |                          |             |                         |
| TKI alone                            | 17/28 (61)   | Reference               | 2/7 (29)   | Reference                | 8/28 (29)   | Reference               |
| Chemo alone                          | 35/48 (73)   | 1.742 (0.643 to 4.725)  | 2/8 (25)   | 0.833 (0.075 to 9.156)   | 22/46 (48)  | 2.292 (0.860 to 6.511)  |
| IO alone                             | 26/34 (76)   | 2.103 (0.709 to 6.487)  | 7/10 (70)  | 5.833 (0.777 to 61.719)  | 11/33 (33)  | 1.250 (0.421 to 3.827)  |
| Chemo-IO                             | 16/20 (80)   | 2.588 (0.720 to 10.891) | 3/7 (43)   | 1.875 (0.206 to 20.390)  | 5/19 (26)   | 0.893 (0.228 to 3.267)  |
| Other                                | 12/17 (71)   | 1.553 (0.439 to 6.005)  | 2/3 (67)   | 5.000 (0.305 to 154.514) | 7/16 (44)   | 1.944 (0.535 to 7.170)  |
| <b>Symptoms</b>                      |              |                         |            |                          |             |                         |
| <b>Fever (&gt;37.5 degrees C)</b>    |              |                         |            |                          |             |                         |
| Yes                                  | 104/127 (82) | 2.457 (1.266 to 4.804)  | 24/42 (57) | 1.714 (0.539 to 5.649)   | 46/121 (38) | 1.614 (0.857 to 3.117)  |
| No                                   | 46/71 (65)   | Reference               | 7/16 (44)  | Reference                | 19/69 (28)  | Reference               |
| <b>Cough</b>                         |              |                         |            |                          |             |                         |
| Yes                                  | 83/103 (81)  | 1.734 (0.902 to 3.383)  | 16/31 (52) | 0.853 (0.300 to 2.407)   | 38/100 (38) | 1.430 (0.783 to 2.636)  |
| No                                   | 67/95 (71)   | Reference               | 15/27 (56) | Reference                | 27/90 (30)  | Reference               |
| <b>Dyspnea</b>                       |              |                         |            |                          |             |                         |
| Yes                                  | 89/106 (84)  | 2.661 (1.369 to 5.318)  | 13/28 (46) | 0.578 (0.200 to 1.627)   | 53/105 (50) | 6.200 (3.102 to 13.228) |
| No                                   | 61/92 (66)   | Reference               | 18/30 (60) | Reference                | 12/85 (14)  | Reference               |
| <b>Nasal Congestion</b>              |              |                         |            |                          |             |                         |
| Yes                                  | 5/6 (83)     | 1.621 (0.253 to 31.467) | 1/2 (50)   | 0.867 (0.033 to 22.650)  | 2/6 (33)    | 0.960 (0.131 to 5.059)  |
| No                                   | 145/192 (76) | Reference               | 30/56 (54) | Reference                | 63/184 (34) | Reference               |
| <b>Conjunctival Congestion</b>       |              |                         |            |                          |             |                         |

|                                   |              |                         |            |                         |             |                         |
|-----------------------------------|--------------|-------------------------|------------|-------------------------|-------------|-------------------------|
| <b>Yes</b>                        | 0/1 (0)      |                         | 0/0        |                         | 0/1 (0)     |                         |
| <b>No</b>                         | 150/197 (76) |                         | 31/58 (53) |                         | 65/189 (34) |                         |
| <b>Diarrhea</b>                   |              |                         |            |                         |             |                         |
| <b>Yes</b>                        | 10/10 (100)  |                         | 2/6 (33)   | 0.397 (0.052 to 2.218)  | 4/9 (44)    | 1.574 (0.378 to 6.154)  |
| <b>No</b>                         | 140/188 (74) |                         | 29/52 (56) | Reference               | 61/181 (34) | Reference               |
| <b>Myalgia</b>                    |              |                         |            |                         |             |                         |
| <b>Yes</b>                        | 9/10 (90)    |                         | 3/6 (50)   | 0.857 (0.147 to 5.009)  | 2/10 (20)   | 0.464 (0.069 to 1.921)  |
| <b>No</b>                         | 141/188 (75) |                         | 28/52 (54) | Reference               | 63/180 (35) | Reference               |
| <b>Otitis</b>                     |              |                         |            |                         |             |                         |
| <b>Yes</b>                        | 0/0          |                         | 0/0        |                         | 0/0         |                         |
| <b>No</b>                         | 150/198 (76) |                         | 31/58 (53) |                         | 65/190 (34) |                         |
| <b>Anosmia</b>                    |              |                         |            |                         |             |                         |
| <b>Yes</b>                        | 4/7 (57)     | 0.411 (0.087 to 2.150)  | 1/2 (50)   | 0.867 (0.033 to 22.650) | 1/7 (14)    | 0.310 (0.016 to 1.868)  |
| <b>No</b>                         | 146/191 (76) | Reference               | 30/56 (54) | Reference               | 64/183 (35) | Reference               |
| <b>Dysgeusia</b>                  |              |                         |            |                         |             |                         |
| <b>Yes</b>                        | 4/7 (57)     | 0.411 (0.087 to 2.150)  | 1/3 (33)   | 0.417 (0.019 to 4.596)  | 1/7 (14)    | 0.310 (0.016 to 1.868)  |
| <b>No</b>                         | 146/191 (76) | Reference               | 30/55 (55) | Reference               | 64/183 (35) | Reference               |
| <b>Headache</b>                   |              |                         |            |                         |             |                         |
| <b>Yes</b>                        | 10/13 (77)   | 1.071 (0.312 to 4.931)  | 2/3 (67)   | 1.793 (0.163 to 39.919) | 4/13 (31)   | 0.845 (0.222 to 2.710)  |
| <b>No</b>                         | 140/185 (76) | Reference               | 29/55 (53) | Reference               | 61/177 (34) | Reference               |
| <b>Fatigue</b>                    |              |                         |            |                         |             |                         |
| <b>Yes</b>                        | 46/54 (85)   | 2.212 (1.002 to 5.424)  | 12/20 (60) | 1.500 (0.505 to 4.623)  | 17/54 (31)  | 0.842 (0.423 to 1.635)  |
| <b>No</b>                         | 104/144 (72) | Reference               | 19/38 (50) | Reference               | 48/136 (35) | Reference               |
| <b>Shivers</b>                    |              |                         |            |                         |             |                         |
| <b>Yes</b>                        | 4/4 (100)    |                         | 2/2 (100)  |                         | 2/4 (50)    | 1.952 (0.230 to 16.583) |
| <b>No</b>                         | 146/194 (75) |                         | 29/56 (52) |                         | 63/186 (34) | Reference               |
| <b>Other</b>                      |              |                         |            |                         |             |                         |
| <b>Yes</b>                        | 17/19 (89)   | 2.940 (0.801 to 18.991) | 3/7 (43)   | 0.616 (0.112 to 3.066)  | 6/19 (32)   | 0.876 (0.295 to 2.340)  |
| <b>No</b>                         | 133/179 (74) | Reference               | 28/51 (55) | Reference               | 59/171 (35) | Reference               |
| <b>None (asymptomatic)</b>        |              |                         |            |                         |             |                         |
| <b>Yes</b>                        | 9/24 (38)    | 0.140 (0.055 to 0.343)  | 1/3 (33)   | 0.417 (0.019 to 4.596)  | 1/22 (5)    | 0.077 (0.004 to 0.384)  |
| <b>No</b>                         | 141/174 (81) | Reference               | 30/55 (55) | Reference               | 64/168 (38) | Reference               |
| <b>Loss of smell and/or taste</b> |              |                         |            |                         |             |                         |
| <b>Yes</b>                        | 4/6 (67)     | 0.630 (0.119 to 4.650)  | 2/2 (100)  |                         | 0/6 (0)     |                         |
| <b>No</b>                         | 146/192 (76) | Reference               | 29/56 (52) |                         | 65/184 (35) |                         |



**Supplementary Table S3:  
List of investigators  
(updated on 9th May 2020)**

| <b>Country</b>                              | <b>Site</b>                                                                 | <b>Principal Investigator</b>     |
|---------------------------------------------|-----------------------------------------------------------------------------|-----------------------------------|
| Argentina                                   | Alexander Fleming Institute, Buenos Aires                                   | Claudio Marcelo Martin            |
|                                             | Center for Medical Education and Clinical Research (CEMIC).<br>Buenos Aires | Gonzalo Recondo                   |
| Australia                                   | Monash Health, Melbourne                                                    | Eva Segelov                       |
|                                             | Peter MacCallum Cancer Centre, Melbourne                                    | Ben Solomon                       |
|                                             | Royal Melbourne Hospital                                                    | Daniel Steinfors                  |
| Belgium                                     | KU Leuven, Leuven                                                           | Thierry Troosters                 |
|                                             | University Hospital Antwerp                                                 | Jan P Van Meerbeeck               |
| Canada                                      | Princess Margaret Cancer Centre, Toronto                                    | Natasha B Leighl                  |
| Chile                                       | Pontifical Catholic University of Chile, Santiago                           | Pablo Munoz<br>Schuffenegger      |
| China                                       | Guangdong Provincial People's Hospital, Guangzhou                           | Yi-Long Wu                        |
|                                             | Tongji Hospital, Wuhan                                                      | Qian Chu                          |
| Colombia                                    | Fundación Santa Fe de Bogotá, Bogota                                        | Andres Cardona                    |
| Costa Rica                                  | Centro de Investigación y Manejo del Cáncer, San José                       | Luis Corrales Rodriguez           |
| Denmark                                     | Aarhus University Hospital                                                  | Azza Ahmed Khalil                 |
| France                                      | APHM, Marseille                                                             | Laurent Greillier                 |
|                                             | AP-HP.Centre Hôpital Cochin                                                 | Marie Wislez                      |
|                                             | AP-HP.Université Paris Saclay                                               | Etienne Giroux Leprieur           |
|                                             | CHRU Strasbourg                                                             | Celine Mascaux                    |
|                                             | Centre Hospitalier Avignon, Avignon                                         | Nicolas Cloarec                   |
|                                             | Centre Hospitalier de la Region D'Ancecy, Metz-Tessy                        | Stephane Hominal                  |
|                                             | Centre hospitalier de Villeneuve-Saint-Georges                              | Pascal Assouline                  |
|                                             | Centre Hospitalier Intercommunal de Crèteil, Crèteil                        | Isabelle Monnet                   |
|                                             | CHITS Sainte Musse, Toulon                                                  | Clarisse Audigier-Valette         |
|                                             | CHRU Brest, Brest                                                           | Karim Amrane                      |
|                                             | CHRU, Lille                                                                 | Alexis Cortot                     |
|                                             | CHU, Nantes                                                                 | Jaafar Bennouna                   |
|                                             | CHU Grenoble Alpes, Grenoble                                                | Denis Moro-Sibilot                |
|                                             | CHU Toulouse                                                                | Julien Mazières                   |
|                                             | Gustave Roussy Cancer Campus, Villejuif                                     | Fabrice Barlesi<br>Benjamin Besse |
|                                             | Hopital Bichat, Paris                                                       | Gerald Zalzman                    |
|                                             | Hospice civils de Lyon, Lyon                                                | Sebastien Couraud                 |
|                                             | Hopital Tenon, Paris                                                        | Jacques Cadranel                  |
|                                             | Institut Curie, Paris                                                       | Nicolas Girard                    |
|                                             | Léon Bérard Cancer Center, Lyon                                             | Maurice Perol                     |
| University of Limoges, Limoges              | Alain Vergnenègre                                                           |                                   |
| French Military Hospital Saint ANNE, Toulon | Olivier Bylicki                                                             |                                   |
| Meaux hospital                              | Laurence Moncelly                                                           |                                   |
| Aix-en-Provence Hospital                    | Stephanie Martinez                                                          |                                   |
| Université Jean Monnet, Saint-Etienne       | Pierre Fournel                                                              |                                   |
| Amiens center                               | Géraldine François                                                          |                                   |
| Chauny hospital center                      | Patrick Dumont                                                              |                                   |
| Germany                                     | Ludwig Maximillians University, Munich                                      | Lukas Kassmann                    |

|                                                  |                                                        |                                         |
|--------------------------------------------------|--------------------------------------------------------|-----------------------------------------|
|                                                  | Lungen Clinic Grosshansdorf                            | Martin Reck                             |
|                                                  | Asklepios Fachkliniken München-Gauting                 | Niels Reinmuth                          |
| Greece                                           | Henry Dunant Hospital Center                           | Giannis Mountzios                       |
| Iran                                             | Vasei Hospital, Sabzevar City                          | Seyed Alireza Javadinia                 |
| Ireland                                          | University Hospital Limerick, Limerick                 | Linda Coate                             |
| Italy                                            | AO Papardo, Palermo                                    | Vincenzo Adamo                          |
|                                                  | AO San Camillo-Forlanini, Roma                         | Giuseppe Cardillo                       |
|                                                  | AO Santi Antonio e Biagio e Cesare Arrigo, Alessandria | Federica Grosso                         |
|                                                  | AOU Careggi, Firenze                                   | Luca Voltolini                          |
|                                                  | AOU Federico II, Napoli                                | Giovanella Palmieri                     |
|                                                  | AOU Luigi Vanvitelli, Napoli                           | Floriana Morgillo                       |
|                                                  | AOU Ospedali Riuniti di Ancona                         | Rossana Berardi                         |
|                                                  | AOU Parma                                              | Luca Ampollini<br>Marcello Tiseo        |
|                                                  | AOU Policlinico Umberto I, Roma                        | Alain Gelibter                          |
|                                                  | AOU Senese, Siena                                      | Luca Luzzi                              |
|                                                  | ASL Alessandria                                        | Cristina Cosentino                      |
|                                                  | ASL Latina                                             | Gian Paolo Spinelli                     |
|                                                  | ASST Cremona                                           | Matteo Brighenti                        |
|                                                  | ASST dei Sette Laghi, Varese                           | Alessandro Tuzi                         |
|                                                  | ASST Fatebenefratelli Sacco, Milano                    | Nicla La Verde                          |
|                                                  | ASST Lariana                                           | Micol Gilardoni                         |
|                                                  | ASST Monza                                             | Stefano Arcangeli                       |
|                                                  | ASUR Marche Area Vasta 1, Urbino                       | Rita Emili                              |
|                                                  | ASST Papa Giovanni XXIII, Bergamo                      | Anna Cecilia Bettini                    |
|                                                  | ASST Spedali Civili di Brescia                         | Paolo Borghetti<br>Salvatore Intagliata |
|                                                  | AUSL della Romagna, Ravenna                            | Gabriele Minuti                         |
|                                                  | AUSL Piacenza                                          | Elisa Maria Stroppa                     |
|                                                  | Fondazione IRCCS Ca' Granda, Policlinico, Milano       | Francesco Grossi                        |
|                                                  | Fondazione IRCCS Istituto Nazionale Tumori, Milano     | Marina Chiara Garassino                 |
|                                                  | Fondazione IRCCS Policlinico San Matteo, Pavia         | Francesco Agustoni                      |
|                                                  | IRCCS Ospedale San Raffaele, Milano                    | Vanessa Gregorc                         |
|                                                  | Istituto Clinico Humanitas, Rozzano                    | Giovanna Finocchiaro                    |
|                                                  | Istituto Europeo di Oncologia, Milano                  | Tommaso De Pas<br>Antonio Passaro       |
|                                                  | Istituto Oncologico Veneto, Padova                     | Giulia Pasello                          |
|                                                  | Istituto Ospedaliero Fondazione Poliambulanza, Brescia | Fausto Meriggi                          |
|                                                  | Istituto Regina Elena, Roma                            | Edoardo Mercadante                      |
|                                                  | Istituto Tumori "Giovanni Paolo" IRCCS, Bari           | Domenico Galetta                        |
|                                                  | Ospedale "Engles Profili", Fabriano                    | Marianna Tudini                         |
|                                                  | Ospedale "Ss. Annunziata", Chieti                      | Domenico Genovesi                       |
|                                                  | Ospedale Maggiore, Bologna                             | Piergiorgio Solli                       |
|                                                  | Ospedale Policlinico San Martino                       | Carlo Genova                            |
|                                                  | Ospedale Sant'Andrea, Roma                             | Raffaele Giusti                         |
|                                                  | Ospedale SG Moscati, Taranto                           | Giovanni Silvano                        |
|                                                  | Ospedali Civico Di Cristina Benfratelli, Palermo       | Livio Blasi                             |
|                                                  | Ospedali Riuniti Padova Sud                            | Rita Chiari                             |
| Ospedali Riuniti, Palermo                        | Francesco Verderame                                    |                                         |
| P.O. di Ponente, Ospedale di Pietra Ligure       | Anna Ponzanelli                                        |                                         |
| PO San Giovanni Di Dio, Frattamaggiore           | Marilena Laterza                                       |                                         |
| Policlinico S.Orsola-Malpighi, Bologna           | Andrea Ardizzoni                                       |                                         |
| Policlinico Universitario Agostino Gemelli, Roma | Emilio Bria                                            |                                         |

|             |                                                                     |                                           |
|-------------|---------------------------------------------------------------------|-------------------------------------------|
|             | Policlinico Universitario Campus Biomedico, Roma                    | Sara Ramella<br>Daniele Santini           |
|             | University of Pisa                                                  | Marcello Carlo Ambrogi                    |
|             | SOC Oncologia - Ospedale degli Infermi. Biella                      | Lisa Pietrogiovanna                       |
|             | Azienda Sanitaria Universitaria Friuli Centrale                     | Gianpiero Fasola                          |
|             | Santa Chiara Hospital, Oncology Dept, Trento                        | Antonello Veccia                          |
|             | University of L'Aquila                                              | Alessio Cortellini                        |
|             | USL Toscana Nord Ovest                                              | Irene Stasi                               |
| Japan       | Kindai University Faculty of Medicine, Osaka-Sayama                 | Tetsuya Mitsudomi                         |
|             | Shizuoka Cancer Centre, Shizuoka                                    | Takehito Shukuya                          |
| Mexico      | Instituto Nacional de Cancerología de México                        | Oscar Arrieta                             |
| Netherlands | Amphia Ziekenhuis, Breda                                            | Nico van Walree                           |
|             | Catherina Hospital, Eindhoven                                       | Ben van der Borne                         |
|             | Groene Hart Ziekenhuis, Gouda                                       | Erica Geraedts                            |
|             | Laurentius Hospital, Roermond                                       | Cordula Pitz                              |
|             | Radboud University, Nijmegen                                        | Olga Schuurbijs                           |
|             | Streekziekenhuis Koningin Beatrix, Winterswijk                      | Dirk Nijmeijer                            |
|             | University Medical Center, Groningen                                | Jeroen Hiltermann                         |
|             | Zuyderland MC, Heerlen                                              | Franchette van Berkmortel                 |
|             | Antonius Hospital, Nieuwegein                                       | Lisanne Kastelijm                         |
|             | Medical Center Leeuwarden                                           | Wouter van Geffen                         |
|             | Maxima Medical Center, Veldhoven                                    | Maggy Youssef                             |
|             | Tergooi Hospital                                                    | Jan Maarten van Haarst                    |
|             | University Medical Center, Maastricht                               | Lizza Hendriks<br>Anne-Marie C. Dingemans |
| Poland      | National Institute of Tuberculosis and Lung Diseases, Warsaw        | Joanna Chorostowska                       |
| Serbia      | Institute for Oncology and Radiology of Serbia; Belgrade            | Jelena Spasic                             |
| Singapore   | National Cancer Center, Singapore                                   | Daniel S W Tan                            |
|             | National University Cancer Institute, Singapore                     | Ross Soo                                  |
| Spain       | Hospital Universitario 12 de Octubre, Madrid                        | Javier Baena Espinar                      |
|             | Hospital Universitario Ramon y Cajal, Madrid                        | Pilar Garrido-López                       |
|             | Catalan Institute of Oncology, L'Hospitalet                         | Ernest Nadal                              |
|             | Universidad de Alcalá, Madrid                                       | Jacobo Rogado                             |
|             | Hospital Clinic Barcelona                                           | Noemi Reguart                             |
|             | Vall d'Hebron Institute of Oncology, Barcellona                     | Enriqueta Felip                           |
| Switzerland | CHUV, Lausanne                                                      | Solange Peters                            |
| Taiwan      | National Taiwan University Hospital, Taipei City                    | Emily Lin                                 |
| UK          | Christie NHS Foundation Trust, Manchester                           | Raffaele Califano                         |
|             | Royal Marsden Hospital, London                                      | Sanjay Papat                              |
|             | Chelsea & Westminster Hospital                                      | Abhijit S Gill<br>Tom Newsom-Davis        |
|             | Greater Manchester (The Christie Hospital and Wythenshawe Hospital) | Fabio Gomes                               |
|             | Northern Centre for Cancer Care; Newcastle Upon Tyne                | Abigail Gault                             |
|             | Guy's & St Thomas' NHSFT                                            | Daniel Smith                              |
|             | Arrowe Park Hospital                                                | Maria Parsonage                           |
|             | United Lincolnshire Hospitals NHS Trust, Lincoln                    | Giuseppe Banna                            |
| USA         | Cedars-Sinai Medical Center, Los Angeles                            | Karen Reckamp                             |
|             | City of Hope, Duarte                                                | Jack West                                 |
|             | Emory University School of Medicine, Atlanta                        | Suresh S Ramalingam                       |
|             | Fox Chase Cancer Center, Philadelphia                               | Hossein Borghaei                          |

|                                                                              |                                     |
|------------------------------------------------------------------------------|-------------------------------------|
| Fred Hutchinson Cancer Research Center, Seattle                              | Renato G Martins                    |
| Georgetown Lombardi Comprehensive Cancer Center,<br>Washington DC            | Stephen V Liu                       |
| Greenebaum Comprehensive Cancer Center, Baltimore                            | Christian Rolfo                     |
| Hospital of the University of Pennsylvania                                   | Melina E Marmarelis                 |
| Huntsman Cancer Center, Utah                                                 | Sonam Puri                          |
| Karmanos Cancer Institute, Detroit                                           | Hirva Mamdani                       |
| Lurie Comprehensive Cancer Center, Chicago                                   | Jyoti D Patel                       |
| Massachusetts General Hospital Cancer Center, Boston                         | Lecia V Sequist                     |
| Mayo Clinic Arizona, Scottsdale                                              | Alan H. Bryce                       |
| Mayo Clinic, Rochester                                                       | Narjust Duma                        |
| Memorial Health Care System, Pembroke Pines Florida                          | Luis E. Raez                        |
| Mount Sinai Hospital, New York                                               | Fred Hirsch                         |
| National Cancer Institute                                                    | Abdul Rafeh Naqash                  |
| Rush Medical College, Chicago                                                | Mary J Fidler                       |
| Stanford University                                                          | Heather Wakelee                     |
| The Ohio State University Wexner Medical Center, Columbus                    | Carolyn J. Presley                  |
| The Sidney Kimmel Comprehensive Cancer Center at Johns<br>Hopkins, Baltimore | Julie R. Brahmer<br>Jarushka Naidoo |
| The University of Chicago                                                    | Christine Bestvina                  |
| UC Davis Comprehensive Cancer Center, Sacramento                             | Jonathan W Riess                    |
| University of Alabama, Birmingham                                            | Aparna Hedge                        |
| University of Pittsburgh Medical Center Hillman Cancer Centre,<br>Pittsburgh | Liza Villaruz                       |
| Vanderbilt University Medical Center, Nashville                              | Leora Horn                          |
| Yale School of medicine, New Haven                                           | Sarah Goldberg                      |
| Hackensack Meridian                                                          | Martin Gutierrez                    |
| Penn Medicine Virtua Cancer Program                                          | Susan Van Loon                      |
| Montefiore, New York                                                         | Balazs Halmos                       |

**Supplementary Table 4:**  
**List of patients recruited for each site**

| Site Name                                                                                                                         | Principal Investigator  | N° patients recruited |
|-----------------------------------------------------------------------------------------------------------------------------------|-------------------------|-----------------------|
| Medical Oncology Department, Thoracic Cancer and Early Drug Development Unit, Hospital Universitario 12 de Octubre, Madrid, Spain | Javier Baena            | 18                    |
| Lung Cancer Unit, IRCCS Ospedale Policlinico San Martino, Genova, Italy                                                           | Carlo Genova            | 12                    |
| Gustave Roussy Institute, Villejuif, France                                                                                       | Fabrice Barlesi         | 11                    |
| Service de Pneumologie, Hopital Tenon, Paris, France                                                                              | Jaques Cadranel         | 11                    |
| Medical Oncology Department, IRYCIS, Hospital Universitario Ramón y Cajal, Madrid, Spain                                          | Pilar Garrido           | 10                    |
| Medical Oncology Unit, University Hospital of Parma, Parma, Italy                                                                 | Marcello Tiseo          | 10                    |
| Oncology Unit, ASST Papa Giovanni XXIII, Bergamo, Italy                                                                           | Anna Cecilia Bettini    | 9                     |
| Medical Oncology Unit, Ospedale "Guglielmo da Saliceto", Piacenza, Italy                                                          | Elisa Stroppa           | 9                     |
| Oncology Department, Lausanne University Hospital, Lausanne University, Lausanne, Switzerland                                     | Solange Peters          | 8                     |
| Department of Oncology and Hematology, AUSL della Romagna, Ravenna, Italy                                                         | Gabriele Minuti         | 8                     |
| Vall d'Hebron University Hospital, Vall d'Hebron Institute of Oncology (VHIO), Barcelona, Spain                                   | Enriqueta Felip         | 8                     |
| Department of Oncology, IRCCS Ospedale San Raffaele, Milan, Italy                                                                 | Vanesa Grecorc          | 8                     |
| Division of Thoracic Oncology, IEO, European Institute of Oncology IRCCS, Milan, Italy                                            | Antonio Passaro         | 8                     |
| Medical Oncology 2, Istituto Oncologico Veneto IRCCS, Padova, Italy                                                               | Giulia Pasello          | 7                     |
| Department of Pulmonology, Erasmus University Medical Center, Rotterdam, The Netherlands                                          | Anne-Marie Dingemans    | 6                     |
| Thoracic Oncology Unit, Medical Oncology Department, Fondazione IRCCS Istituto Nazionale dei Tumori, Milan, Italy                 | Marina Chiara Garassino | 5                     |
| Thoracic Surgery Unit, Azienda Ospedaliero Universitaria Careggi, Firenze, Italy                                                  | Luca Voltolini          | 5                     |
| Medical Oncology Unit, Sant'Andrea Hospital, Rome, Italy                                                                          | Raffaele Giusti         | 5                     |
| Radiotherapy Unit, Department of Oncology, Azienda Ospedaliero Universitaria Careggi, Firenze, Italy                              | Vieri Scotti            | 4                     |
| Medical Oncology, Fondazione IRCCS Policlinico "San Matteo", Pavia, Italy                                                         | Francesco Agustoni      | 4                     |
| Service de Pneumologie, CHU, Toulouse, France                                                                                     | Julien Mazieres         | 3                     |
| Mesothelioma Unit, Azienda Ospedaliera Nazionale Santi Antonio e Biagio e Cesare Arrigo, Alessandria, Italy                       | Federica Grosso         | 3                     |
| Thoracic Surgery Unit, Experimental Clinical Oncology Department, IRCCS Regina Elena National Cancer Institute, Rome, Italy       | Edoardo Mercadante      | 3                     |
| Medical Oncology, AOU Ospedali Riuniti di Ancona, Università Politecnica delle Marche, Ancona, Italy                              | Rossana Berardi         | 3                     |

|                                                                                                                                             |                      |   |
|---------------------------------------------------------------------------------------------------------------------------------------------|----------------------|---|
| Medical Oncology, ASST Cremona, Cremona, Italy                                                                                              | Matteo Brighenti     | 3 |
| Medical Oncology, ASST Spedali Civili di Brescia, Brescia, Italy                                                                            | Salvatore Intagliata | 2 |
| Portsmouth Hospitals NHS Trust, Portsmouth, UK                                                                                              | Giuseppe Banna       | 2 |
| Department of Biotechnology and Applied Clinical Science, University of L'Aquila, L'Aquila, Italy                                           | Alessio Cortellini   | 2 |
| Comprehensive Cancer Center, Fondazione Policlinico Universitario Agostino Gemelli IRCCS, Università Cattolica del Sacro Cuore, Rome, Italy | Emilio Bria          | 2 |
| Thoracic Surgery, Policlinico S.Orsola, Alma Mater Studiorum University, Bologna, Italy                                                     | Piergiorgio Solli    | 2 |
| Department of Oncology and Hematology, Humanitas Clinical and Research Center IRCCS, Rozzano, Italy                                         | Giovanna Finocchiaro | 2 |
| Department of Hematology and Oncology, Vanderbilt Ingram Cancer Center, Vanderbilt University, Nashville, Tennessee, USA                    | Leora Horn           | 1 |
| Medical Oncology, ASST Fatebenefratelli Sacco, Milan, Italy                                                                                 | Nicla La Verde       | 1 |
| Guangdong Lung Cancer, Guangdong General Hospital, Guangzhou, China                                                                         | Yi-Long Wu           | 1 |
| Medical Oncology, Azienda Ospedaliera Nazionale Santi Antonio e Biagio e Cesare Arrigo, Alessandria, Italy                                  | Silvia Zai           | 1 |
| Georgetown Lombardi Comprehensive Cancer Center, Georgetown University, Washington, DC                                                      | Stephen Liu          | 1 |
| Oncology Unit, ASST dei Sette Laghi, Varese, Italy                                                                                          | Claudio Chini        | 1 |
| Thoracic Oncology Unit, SHUPP, CHU Grenoble-Alpes, Grenoble France                                                                          | Denis Moro-Sibilot   | 1 |

## Protocol

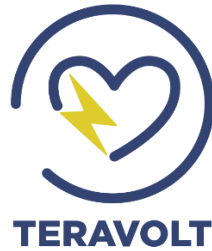

# International registry on thoracic cancer patients with COVID-19 TERAVOLT (Thoracic cancer international COVID-19 collaboration)

**Number of versions:** Version 1.2

**Date:** March 19<sup>th</sup>, 2020

**Type of the study:** observational retro-prospective

**Coordinator centre:** Fondazione IRCCS Istituto Nazionale Tumori, Milano.

**Principal Investigator:** Marina Chiara Garassino

**Italian Sponsor/Promoter:** Fondazione IRCCS Istituto Nazionale Tumori, Milano.

**Organizational Committee:** Solange Peters, Leora Horn, Fabrice Barlesi, Anna Marie Dingenmans, Alessio Cortellini, Alessandro De Toma, Giuseppe Viscardi, Vera Pancaldi, Juliene Mazieres, Annalisa Trama, Olivier Michelin, Jeremy Warner, Valter Torri.

## RATIONALE

China first, and the rest of the world subsequently, have been experiencing the outbreak of the severe acute respiratory syndrome coronavirus 2 (SARSCoV-2), namely coronavirus disease (COVID-19), since the end of 2019 [1]. Clinical pictures of COVID-19 can vary a lot, from mild flu-like forms, to severe multiple organ dysfunction syndromes rather than

respiratory failure [2], which might be related to the multiple organs distribution of angiotensin converting enzyme 2, the functional receptor for SARS-CoV-2 [3, 4].

To date, the spread of COVID-19 has already reached the epidemiological criteria to be declared pandemic [5], and on March 11<sup>th</sup>, 2020, with more than 118,000 cases in 114 countries, and 4,291 deaths, the WHO have officially confirmed the pandemic [6].

By the end of February 2020 COVID-19 have already hit Europe hardly, particularly Italy, with 12462 confirmed cases according to the Istituto Superiore di Sanità as of March 11<sup>th</sup>, and 827 deaths [7]. Considering the infection rapid spread, which can affect a high percentage of each community in a short time, the mortality rate and the death risk estimation are surely related with the breakdown of the healthcare systems. In China the estimated risk of death varied indeed from the 12% in the epicentre of the epidemic, to  $\approx 1\%$  in less affected regions [8] including Europe, USA, Australia, Latin America, Iran, Canada and many others. It is well known that cancer patients are more susceptible to infection compared to healthy people and non-cancer patients; that predisposition have been historically related to the systemic malignancy-related immunosuppressive state and to active disease-oriented treatments, such as chemotherapy, radiotherapy and surgery [9-12]. Things might be different for cancer patients undergoing immune checkpoint blockade, who represents an exception from the immunological point of view. A kind of paradoxical immunological response to influenza infection/vaccination during immune checkpoint inhibitors have been already described, even suggesting improved oncological outcomes for these patients [13-15].

The first Chinese report described 18 ( $\approx 1\%$ ) out of 1590 COVID-19 cases with a history of cancer (mostly lung cancer). Despite the small sample size, the authors observed that the cohort of cancer patients had had an increased risk of developing severe COVID-19-related events compared to non-cancer population [16]. Surely the sample size and high variability of the cancer population might have affected the reliability of their results, however cancer care professionals are now called to cautiously manage this emergency and cannot fail to consider that cancer patients have to be carefully monitored and prevented from COVID-19 development risk.

Considering this background, we propose a global registry to describe and monitor thoracic cancer patients (NSCLC, SCLC, Malignant Pleural Mesothelioma [MPM] and



thymic epithelial tumours [TETs]) with COVID-19, factor associated to severe events, develop a tailored risk assessment strategy for thoracic cancer patients, develop treatment recommendations for thoracic cancer patients .

## **STUDY DESIGN and ENDPOINTS**

This is a longitudinal multi-centre study on thoracic cancer patients (any age, sex, histology, stage, in active treatment as well as in clinical follow-up) which, experienced COVID-19. Information on clinical features, clinical course, management and outcomes will be collected for both, thoracic cancers and COVID-19 infection (see Appendix 1 including the list of data to collect). Considering the limited data available about COVID-19 evolution, the sample size will be not anticipated. However, with about 150 centres and a median of 5 patients at every centre, a sample size of 750 patients approximately can produce a confidence interval for the categorical estimate of +/-2%. Clinical data will be extracted from medical records of consecutive patients from January 1st, 2020 until the end of pandemic declared by WHO.

### **Inclusion criteria**

Any thoracic cancer patients with a COVID-19 diagnosis defined as follow:

- Laboratory confirmed (RT-PCR techniques) COVID-19.
- Suspected COVID-19 cases; diagnosed clinically based on symptoms (fever  $>37.5^{\circ}$ , decrease of oximeter saturation of at least 5 %, cough, diarrhoea, otitis, dysgeusia, myalgia, arthralgia, conjunctivitis and rhinorrhoea and exposures).
- Clinically diagnosed cases; suspected cases with lung imaging features consistent with coronavirus pneumonia.
- Asymptomatic cases; diagnosed based on positive viral nucleic acid test results but without any COVID- 19 symptoms.

The following explorative endpoints will be evaluated:

- major demographic features of thoracic cancer patients with COVID-19 (e.g. age, sex, place of residence);

- prevalence of major comorbidities in thoracic cancer patients with COVID-19;
- proportion of thoracic cancer patients experiencing a severe event overall and by severe events including deaths;
- proportion of thoracic cancer patients by COVID-19 clinical course;
- proportion of thoracic cancer patients with COVID-19 who received chemotherapy, surgery, radiotherapy, immune check point inhibitors in the last 2 months before COVID-19 infection;
- predictive factors of severe events in thoracic cancer patients with COVID-19 including cancer-related treatment;
- prognostic factors of thoracic cancer patients with COVID-19 including cancer-related treatment;

Additional outcomes to consider, in a second phase of the registry implementation, could include the follow-up of the thoracic cancer patient survivors in terms of treatment (when cancer-related treatment started again, which treatment) and outcomes. This will allow to assess the impact of the COVID-19 pandemic and the decision taken with regards to thoracic cancer patients treatment on their cancer outcomes (e.g. progression, death).

## **STATISTICAL ANALYSES**

Descriptive statistics of patients demographical (e.g. age, sex,) and clinical characteristics (e.g. comorbidities, severe events, therapy) will be provided together with 95% confidence intervals. Association with baseline factors with continuous outcome will be analysed by generalised linear models, while categorical analyses will be approached with logistical model and time-to-event endpoints will be analyzed semiparametric proportional hazard model.

## **DATABASE MANAGEMENT**

Data for this study will be collected in a REDCap® (Research Electronic Data Capture) database. REDCap is a secure web platform for building and managing online databases and surveys. REDCap's streamlined process for rapidly creating and designing projects offers a vast array of tools that can be tailored to virtually any data collection strategy. REDCap provides an intuitive user interface that streamlines project development and improves data entry through real-time validation rules (with automated data type and range checks). REDCap also provides easy data manipulation (with audit trails for reporting, monitoring and querying patient records) and an automated export mechanism to common statistical packages (SPSS, SAS, Stata, R/S-Plus).

Investigators who have received appropriate institutional research approval (i.e., Institutional Review Board or Institutional Ethics Committee) will be given a web link with a survey where they can enter data about their specific patients. Guidelines about the data collection and to properly enter the data will be developed. Investigators at Vanderbilt University Medical Center in Nashville, TN, United States (Leora Horn, MD and Jennifer Whisenant, PhD) will manage the online survey and keep records of all institutional approvals.

REDCap servers are housed in a local data center at Vanderbilt University Medical Center, and all web-based information transmission is encrypted. REDCap was developed specifically around HIPAA-Security guidelines and is recommended to researchers by both our Privacy Office and Institutional Review Board. REDCap has been disseminated for local use at ~3,100 other academic/non-profit consortium partners in 128 countries. Vanderbilt leads the REDCap Consortium, which currently supports more than 614,000 projects and 834,000 users. More information about the consortium and system security can be found at <http://www.projectredcap.org/>.

To comply with local regulations regarding use and disclosure of protected health information (PHI), patient identifiers (e.g., name, date of birth, medical record number) will not be collected as part of this study. Investigators will access the medical record of their patient, enter required data into the database. The database will be maintained for an infinite amount of time. The protected health information will not be reused or disclosed to any other person or entity, except as required by law, for authorized oversight of the research project. Future research, that is not

defined in this protocol, wishing to access the REDcap database will need institutional review board/ethic review board approval before obtaining access to the REDcap database.

## **ETHICAL CONSIDERATIONS**

All the study procedures will be in accordance with the precepts of Good Clinical Practice and the declaration of Helsinki. According to the regulation (EU) 2016/679 of the European Parliament and of the Council of 27 April 2016, the following requirements regarding personal data will be guaranteed: pseudonymisation and encryption, the confidentiality, integrity, availability and resilience of treatment systems and services, the ability to restore the availability and access of data in the event of a physical or technical accident.

## **REFERENCES**

1. Chen N, Zhou M, Dong X, et al. Epidemiological and clinical characteristics of 99 cases of 2019 novel coronavirus pneumonia in Wuhan, China: a descriptive study. *Lancet [journal on the Internet]*. 2020 15; 395(10223):507-513. [cited 2020 March 15] doi: 10.1016/S0140-6736(20)30211-7. [Epub ahead of print]
2. Wang C, Horby PW, Hayden FG, Gao GF. A novel coronavirus outbreak of global health concern. *Lancet [journal on the Internet]*. 2020 Feb 15;395(10223):470-473. [cited 2020 March 15] doi: 10.1016/S0140-6736(20)30185-93. [Epub ahead of print]
3. Zhou P, Yang XL, Wang XG, et al. A pneumonia outbreak associated with a new coronavirus of probable bat origin. *Nature [journal on the Internet]*. 2020 Mar;579(7798):270-273. [cited 2020 March 15] doi: 10.1038/s41586-020-2012-7. [Epub ahead of print]
- 4 Hamming I, Timens W, Bulthuis ML, Lely AT, Navis G, van Goor H. Tissue distribution of ACE2 protein, the functional receptor for SARS coronavirus. A first step in understanding SARS pathogenesis *J Pathol*. 2004 Jun;203(2):631-7. doi: 10.1002/path.1570.
5. Callaway E. Time to use the p-word? Coronavirus enter dangerous new phase. *Nature* 2020; 579: 12. doi: 10.1038/d41586-020-00551-1. Available from: <https://www.nature.com/articles/d41586-020-00551-1>. [Accessed on March 15th, 2020].
6. WHO Director-General's opening remarks at the media briefing on COVID-19 - 11 March 2020. Available from: <https://www.who.int/dg/speeches/detail/who-director-general-s-opening-remarks-at-the-media-briefing-on-covid-19---11-march-2020> [Accessed on March 15th, 2020].
7. Remuzzi A, Remuzzi G. COVID-19 and Italy: what next? *Lancet [journal on the Internet]*. 2020 Apr 11;395(10231):1225-1228. [cited 2020 March 15] doi: 10.1016/S0140-6736(20)30627-9. [Epub ahead of print]

8. Mizumoto K, Chowell G. Estimating Risk for Death from 2019 Novel Coronavirus Disease, China, January-February 2020. *Emerg Infect Dis* [journal on the Internet]. 2020 Mar 13;26(6). [cited 2020 March 15] doi: 10.3201/eid2606.200233. [Epub ahead of print]
9. Kamboj M, Sepkowitz KA. Nosocomial infections in patients with cancer. *Lancet Oncol*. 2009 Jun;10(6):589-97. doi: 10.1016/S1470-2045(09)70069-5.
10. Li JY, Duan XF, Wang LP, et al. Selective depletion of regulatory T cell subsets by docetaxel treatment in patients with nonsmall cell lung cancer. *J Immunol Res*. [journal on the Internet]. 2014;2014:286170. [cited 2020 March 15] doi: 10.1155/2014/286170. [Epub ahead of print]
11. Longbottom ER, Torrance HD, Owen HC, et al. Features of postoperative immune suppression are reversible with interferon gamma and independent of interleukin-6 pathways. *Ann Surg*. 2016 Aug;264(2):370-7. doi: 10.1097/SLA.0000000000001484.
12. Sica A, Massarotti M. Myeloid suppressor cells in cancer and autoimmunity. *J Autoimmun* [journal on the Internet]. 2017 Dec;85:117-125. [cited 2020 March 15] doi: 10.1016/j.jaut.2017.07.010. [Epub ahead of print]
13. Bersanelli M, Giannarelli D, Castrignanò P, et al. Influenza Vaccine Indication During therapy with Immune checkpoint inhibitors: a transversal challenge. The INVIDIa study. *Immunotherapy*. 2018 Oct;10(14):1229-1239. doi: 10.2217/imt-2018-0080.
14. Bersanelli M, Scala S, Affanni P, et al. Immunological insights on influenza infection and vaccination during immune checkpoint blockade in cancer patients. *Immunotherapy* [journal on the Internet]. 2020 Feb;12(2):105-110. [cited 2020 March 15] doi: 10.2217/imt-2019-0200. [Epub ahead of print]
15. Bersanelli M, Buti S, Banna GL, et al. Impact of influenza syndrome and flu vaccine on survival of cancer patients during immunotherapy in the INVIDIa study. *Immunotherapy* [journal on the Internet]. 2020 Feb;12(2):151-159. [cited 2020 March 15] doi: 10.2217/imt-2019-0180. [Epub ahead of print]
16. Liang W, Guan W, Chen R, et al. Cancer patients in SARS-CoV-2 infection: a nationwide analysis in China. *Lancet Oncol* [journal on the Internet]. 2020 Mar; 21(3):335-337. [cited 2020 March 15]. doi: 10.1016/S1470-2045(20)30096-6. [Epub ahead of print].
